# Supplementary material for: Molecular Docking and Dynamics Simulation Studies Predict Potential Anti-ADAR2 Inhibitors: Implications for the Treatment of Cancer, Neurological, Immunological and Infectious Diseases
Source: MDPI journal article supplement (doi:10.3390/ijms24076795), 2023-04-05
Supplement: s1 [file s1]

### Supplementary Information

## **Molecular Docking and Dynamics Simulation Studies Predict Potential Anti-ADAR2 Inhibitors: Implications for the Treatment of Cancer, Neurological, Immunological and Infectious Diseases**

### Content

Figure S1: Plot of binding energy against molecular weight of the top 516 compounds (from the consensus scoring) via A) AutoDock Vina and B) Glide (Maestro).

Figure S2: Conformation and protein-ligand interaction profiles of the binding pose with the most negative binding energy of compounds A) ZINC000085950180, B) ZINC000085511995, C) ZINC000085850673, D) ZINC000085996580, E) ZINC000085734971, F) ZINC000014612330, G) ZINC0000100513617 and H) ZINC000013462928. For the interaction profiles, purple arrows, red lines and combination of “red and blue” lines represent hydrogen bonds, pi-cation interactions and salt-bridges, respectively.

Figure S3: Root mean square deviation (RMSD), radius of gyration (Rg) and root mean square fluctuation (RMSF) plots of the unbound protein and ADAR2-ligand complexes after 100 ns MD simulations. (A) RMSD (B) Rg and (C) RMSF plot of the systems. The RMSF revealed less fluctuations in residues found in the active site region signifying strong and stable interactions between the ADAR2 and the ligands.

Figure S4: Chemical structures of the rest of the compounds in Table 2.

Table S1: Consensus docking scores and OSIRIS Datawarrior toxicity predictions of the 69 potential lead compounds with reasonably good pharmacokinetics profiles. Table cells with “None”, “High” and “Low” classifications are highlighted green, red and yellow, respectively.

Table S2: Binding energies of the potential leads when docked against the 5-HT2CR via AutoDock Vina.

### Supplementary Figures

A)

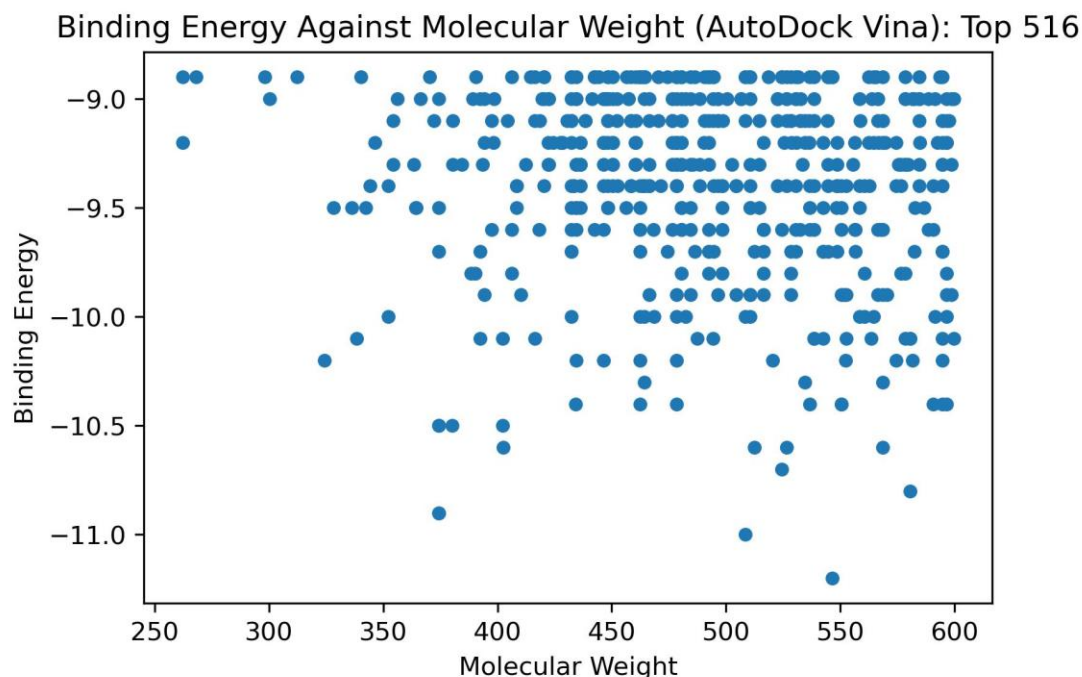

B)

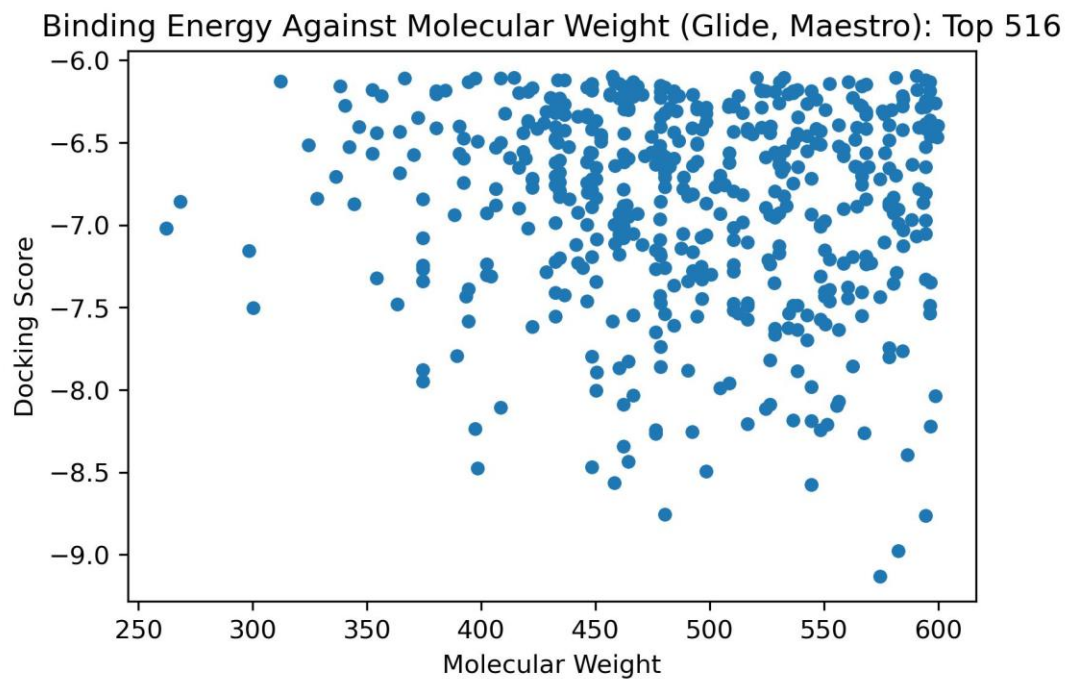

Figure S1: Plot of binding energy against molecular weight of the top 516 compounds (from the consensus scoring) via A) AutoDock Vina and B) Glide (Maestro).

A)

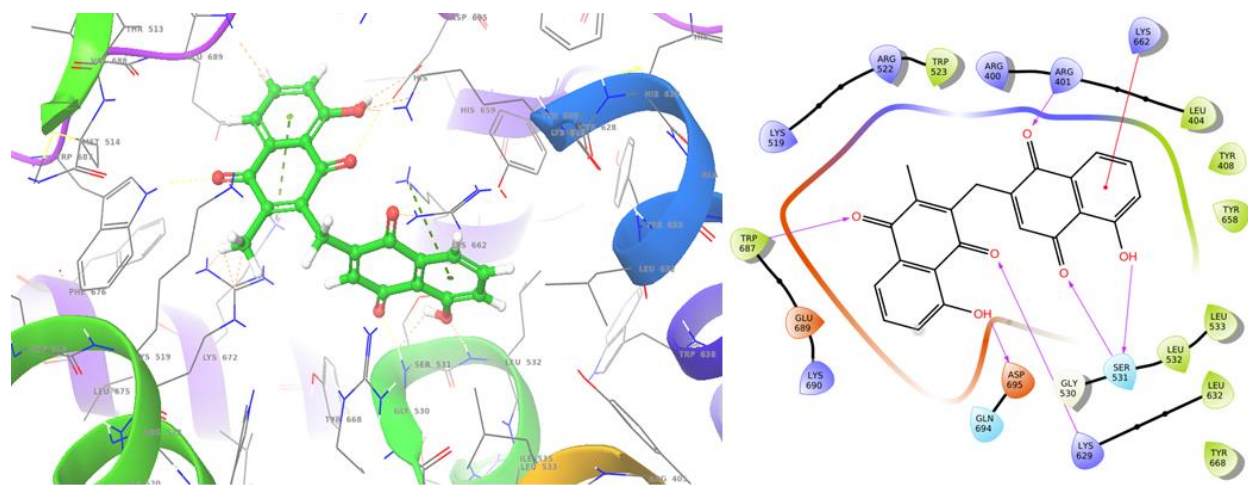

B)

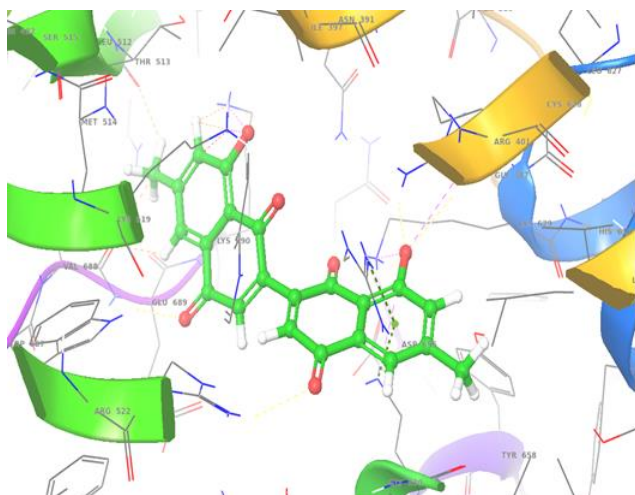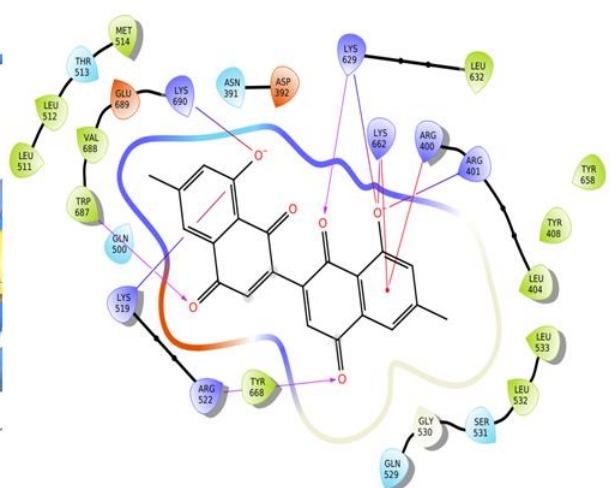

C)

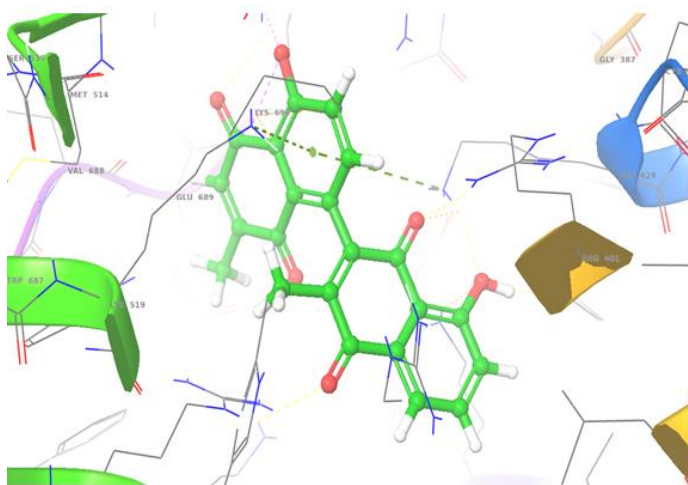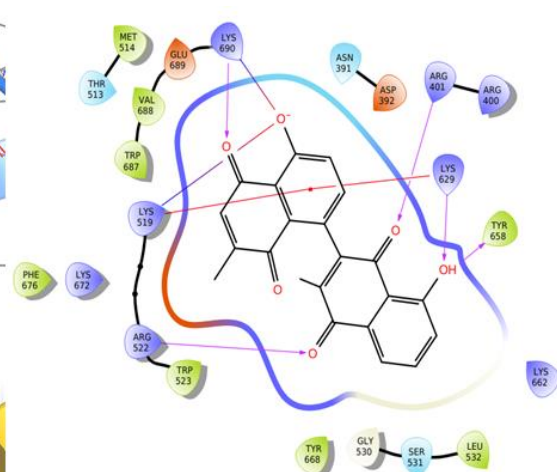

D)

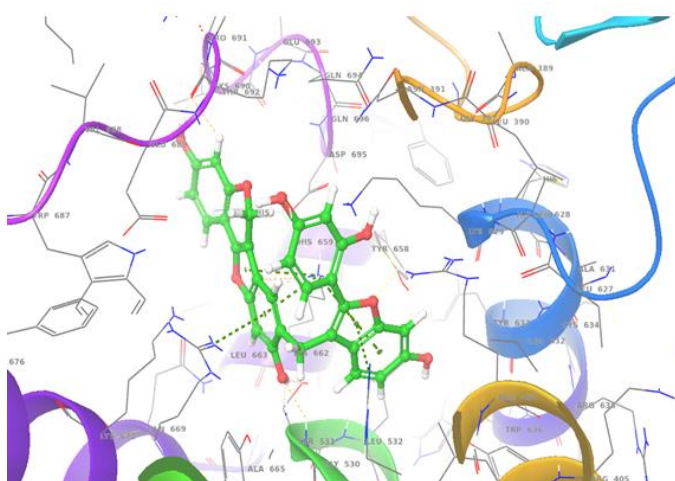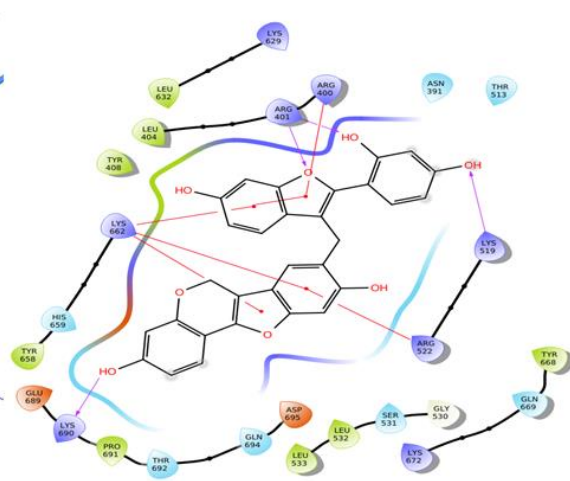

E)



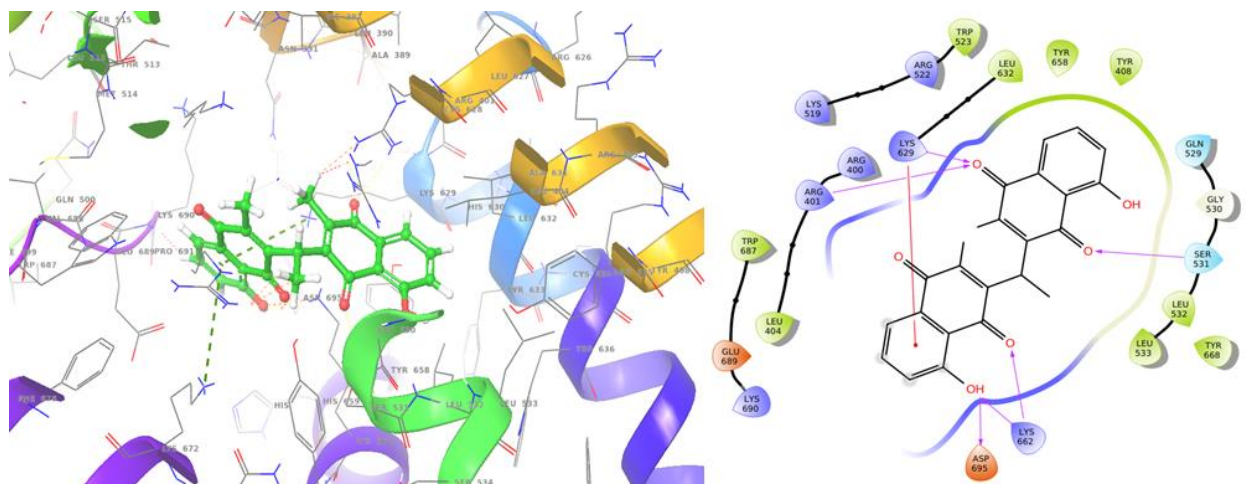

F)

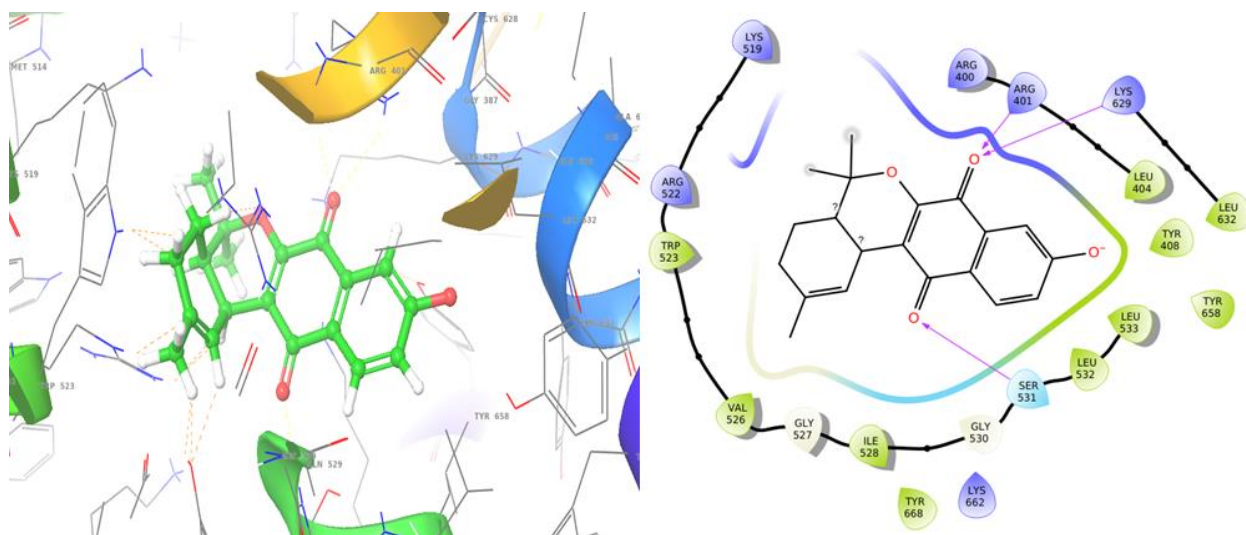

G)

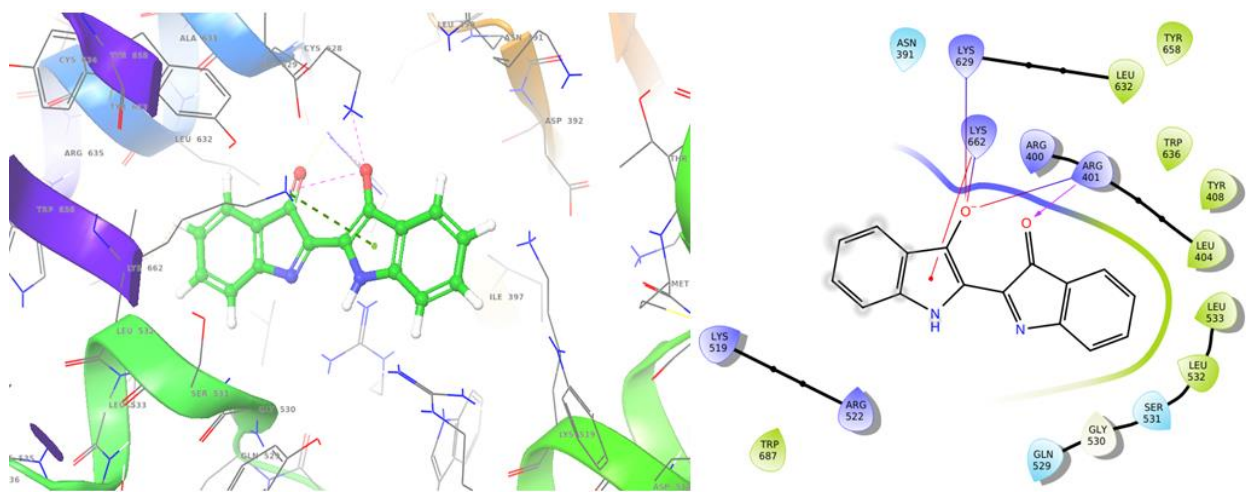

H)

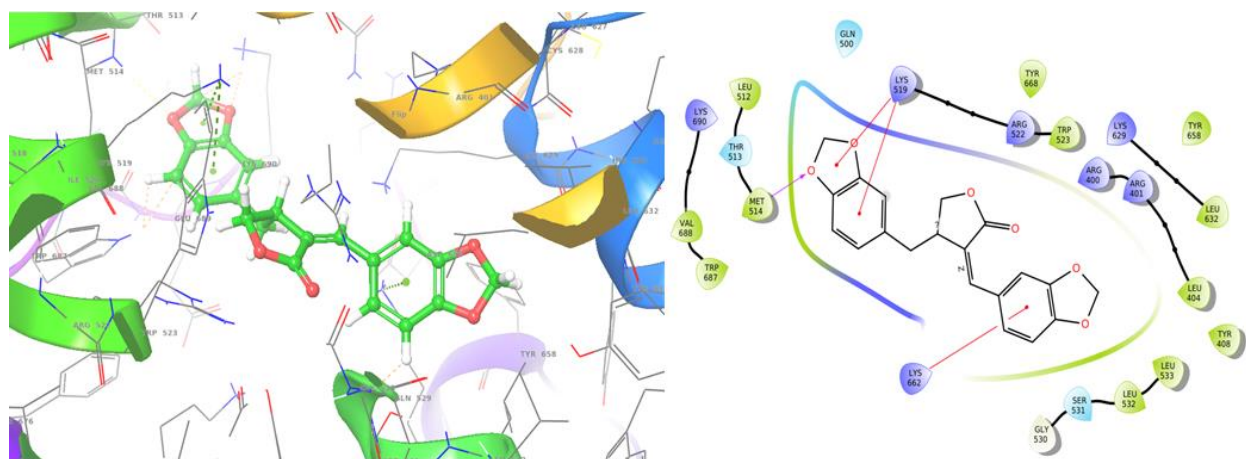

Figure S2: Conformation and protein-ligand interaction profiles of the binding pose with the most negative binding energy of compounds A) ZINC000085950180, B) ZINC000085511995, C) ZINC000085850673, D) ZINC000085996580, E) ZINC000085734971, F) ZINC000014612330, G) ZINC000100513617 and H) ZINC000013462928. For the interaction profiles, purple arrows, red lines and combination of “red and blue” lines represent hydrogen bonds, pi-cation interactions and salt-bridges, respectively.

A)

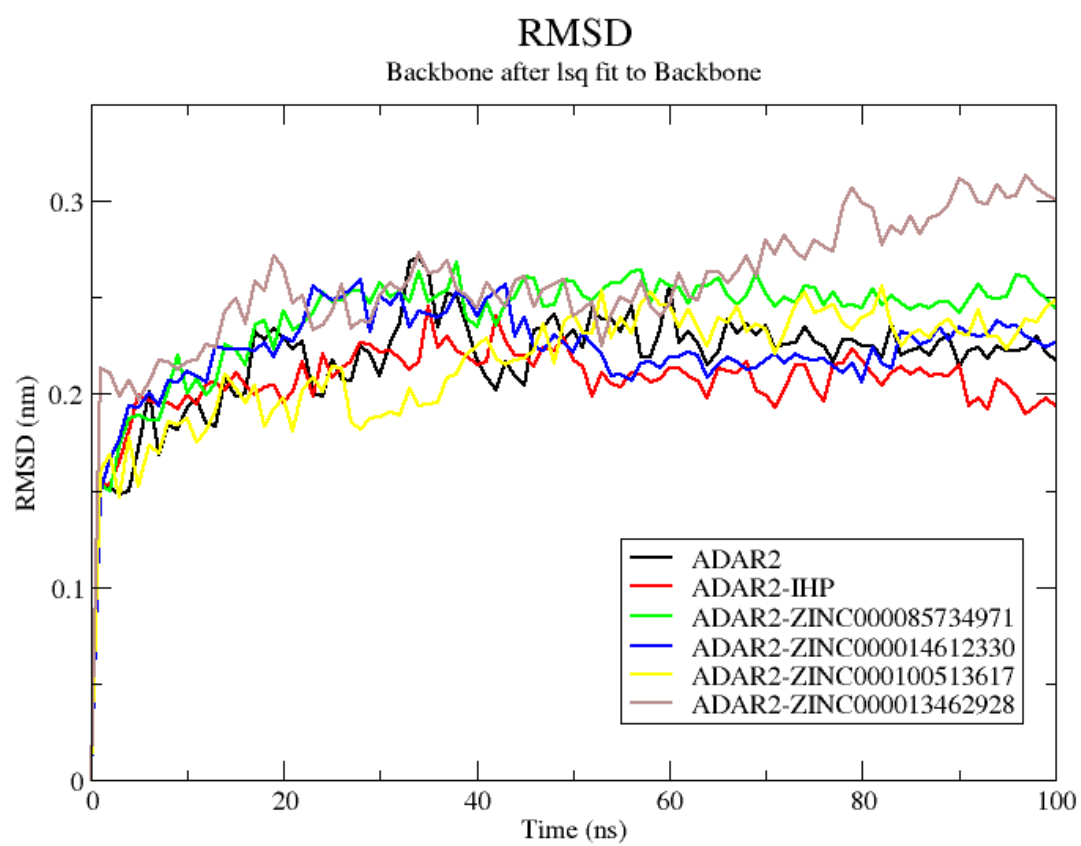

B)

Radius of gyration (total and around axes)

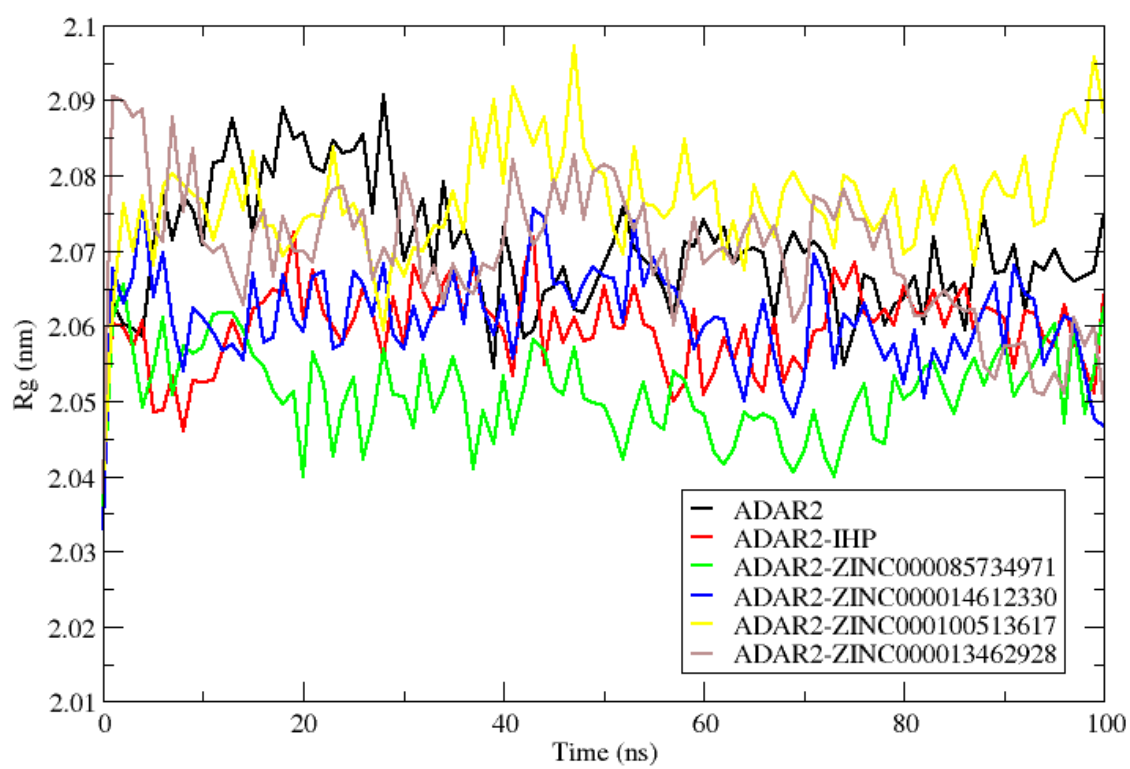

C)

## RMS fluctuation

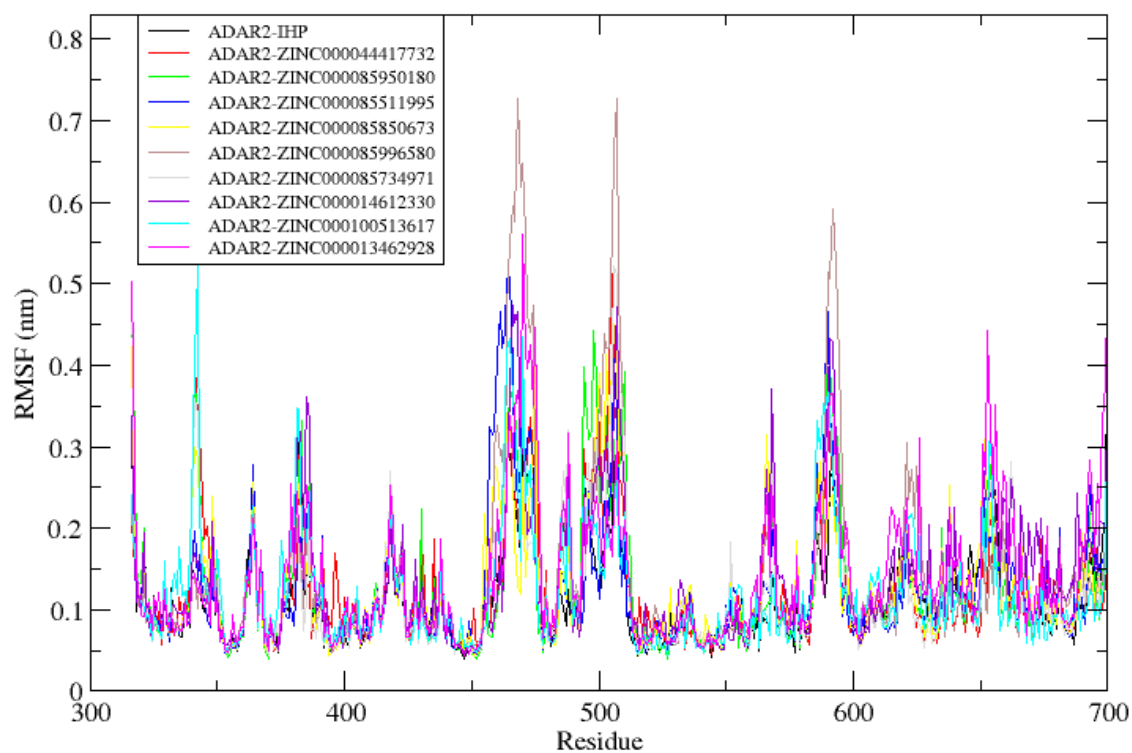

Figure S3: Root mean square deviation (RMSD), radius of gyration (Rg) and root mean square fluctuation (RMSF) plots of the unbound protein and ADAR2-ligand complexes after 100 ns MD simulations. (A) RMSD (B) Rg and (C) RMSF plot of the systems. The RMSF revealed less fluctuations in residues found in the active site region signifying strong and stable interactions between the ADAR2 and the ligands.



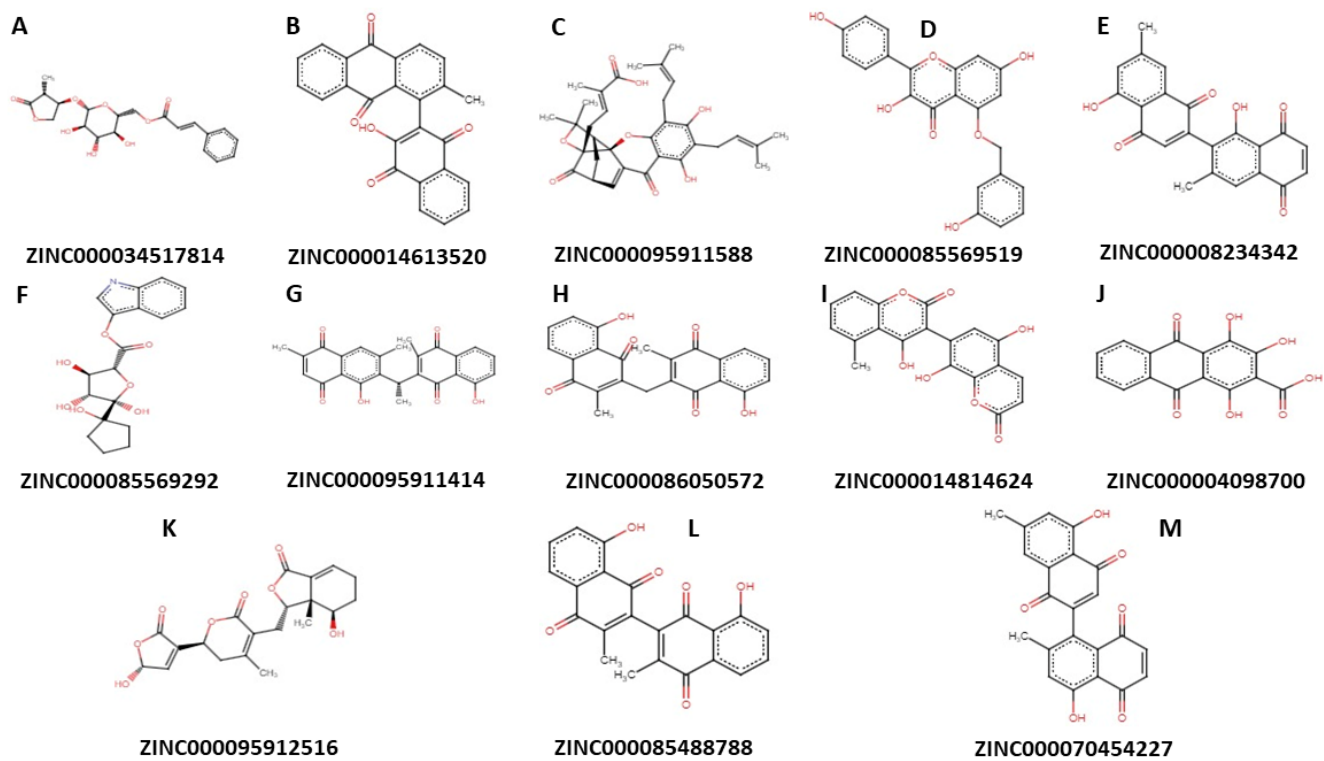

Figure S4: Chemical structures of the rest of the compounds in Table 2.

### Supplementary Tables

Table S1: Consensus docking scores and OSIRIS Datawarrior toxicity predictions of the 69 potential lead compounds with reasonably good pharmacokinetics profiles. Table cells with “None”, “High” and “Low” classifications are highlighted green, red and yellow, respectively.

| Compound         | Consensus Docking Score | Mutagenic | Tumorigenic | Irritant | Reproductive Effect |
|------------------|-------------------------|-----------|-------------|----------|---------------------|
| ZINC000044417732 | -9.424132277            | None      | None        | None     | None                |
| ZINC000085950180 | -9.189206515            | None      | None        | None     | None                |
| ZINC000085511995 | -9.083019591            | None      | None        | None     | None                |
| ZINC000085850673 | -8.871610427            | None      | None        | None     | High                |
| ZINC000085996580 | -8.810739897            | None      | None        | None     | High                |
| ZINC000085734971 | -8.764515982            | None      | None        | None     | None                |
| ZINC000034517814 | -8.754400007            | None      | None        | High     | None                |
| ZINC000014613520 | -8.644636775            | Low       | None        | High     | None                |
| ZINC000095911588 | -8.628725069            | None      | None        | None     | High                |
| ZINC000085569519 | -8.421305685            | High      | None        | None     | None                |
| ZINC00008234342  | -8.389787435            | None      | None        | None     | None                |
| ZINC000085569292 | -8.389513991            | None      | None        | None     | None                |
| ZINC000095911414 | -8.37542394             | None      | None        | None     | None                |
| ZINC000086050572 | -8.368778188            | None      | None        | None     | None                |
| ZINC000014612330 | -8.356767518            | None      | None        | None     | None                |
| ZINC000014814624 | -8.283046901            | Low       | None        | High     | High                |
| ZINC000004098700 | -8.252200993            | Low       | None        | High     | None                |
| ZINC000095912516 | -8.183844059            | Low       | None        | None     | None                |
| ZINC000085488788 | -8.172253027            | None      | None        | None     | None                |
| ZINC000070454227 | -8.170951771            | None      | None        | None     | High                |
| ZINC000013378578 | -8.169429139            | None      | None        | None     | High                |
| ZINC000015214955 | -8.136074968            | Low       | None        | None     | None                |
| ZINC000103579759 | -8.12789818             | None      | None        | None     | None                |
| ZINC000100513617 | -8.109951671            | None      | None        | None     | None                |
| ZINC000100017459 | -8.1036925              | None      | None        | None     | None                |
| ZINC000015254000 | -8.093156447            | Low       | None        | High     | Low                 |
| ZINC000095911781 | -8.054786976            | None      | None        | None     | None                |
| ZINC000095911983 | -8.027689262            | Low       | None        | High     | None                |
| ZINC000013378580 | -8.013173606            | None      | None        | Low      | High                |
| ZINC000014454969 | -8.000128717            | None      | None        | High     | None                |
| ZINC000013379151 | -7.970985095            | None      | None        | None     | Low                 |
| ZINC000014589300 | -7.966771183            | None      | None        | None     | High                |
| ZINC000085509705 | -7.965240493            | None      | None        | None     | High                |
| ZINC000095914424 | -7.962915559            | None      | None        | None     | None                |
| ZINC000100014196 | -7.960751851            | None      | None        | None     | None                |
| ZINC000085569270 | -7.94949153             | None      | None        | None     | None                |
| ZINC000085569501 | -7.94661089             | High      | None        | None     | None                |
| ZINC000003918875 | -7.879107772            | High      | None        | High     | None                |

|                   |              |      |      |      |      |
|-------------------|--------------|------|------|------|------|
| ZINC000014690579  | -7.871547314 | None | None | None | None |
| ZINC000085569417  | -7.841426619 | High | None | None | None |
| ZINC000004215683  | -7.801833937 | None | None | None | None |
| ZINC000085532383  | -7.800595891 | None | None | None | None |
| ZINC000085569484  | -7.798554446 | High | None | None | None |
| ZINC000085594490  | -7.791704201 | High | Low  | None | None |
| ZINC000013462928  | -7.790177528 | None | None | None | High |
| ZINC000085541078  | -7.780420675 | None | None | High | None |
| ZINC000095912505  | -7.779649507 | None | None | None | None |
| ZINC000070454860  | -7.759985149 | None | None | None | None |
| ZINC000085645027  | -7.759431157 | None | None | None | None |
| ZINC000031597169  | -7.754204662 | None | None | None | None |
| ZINC000085508454  | -7.753507879 | None | None | High | None |
| ZINC000085569502  | -7.746503785 | High | None | None | None |
| ZINC000095914427  | -7.741135858 | None | None | High | None |
| ZINC000033832248  | -7.736811479 | None | None | None | None |
| ZINC000085569474  | -7.73672787  | High | None | None | None |
| ZINC000003979002  | -7.723704809 | None | None | None | High |
| ZINC000014721724  | -7.695381938 | None | None | High | None |
| ZINC0000103543244 | -7.666396706 | None | Low  | Low  | None |
| ZINC000095909432  | -7.655237256 | None | None | None | None |
| ZINC000059586481  | -7.651132524 | None | None | None | None |
| ZINC000006095580  | -7.642973788 | None | None | High | None |
| ZINC000085970028  | -7.620633781 | None | None | None | High |
| ZINC000013485149  | -7.608347346 | None | None | None | None |
| ZINC000085486897  | -7.604504173 | None | None | High | High |
| ZINC000095911779  | -7.571288517 | None | None | None | None |
| ZINC000059588402  | -7.557084706 | High | High | None | None |
| ZINC000059587863  | -7.554203147 | Low  | Low  | High | None |
| ZINC000005714910  | -7.513063127 | Low  | None | None | Low  |
| ZINC000085569204  | -7.50319783  | None | High | None | High |

Table S2: Binding energies of the potential leads when docked against the 5-HT<sub>2</sub>CR via AutoDock Vina.

| Compound         | Name         | Binding Energy |
|------------------|--------------|----------------|
| Ritanserlin      | Ritanserlin  | -12.7          |
| ZINC000044417732 | Chitranone   | -10.3          |
| ZINC000085950180 | Isozeylanone | -10.5          |
| ZINC000085511995 | Mamegakinone | -10.5          |

|                  |                                                                                                         |       |
|------------------|---------------------------------------------------------------------------------------------------------|-------|
| ZINC000085850673 | 3,8'-Bi[2-methyl-5-hydroxy-1,4-naphthoquinone]                                                          | -10.9 |
| ZINC000085996580 | 8-[[2-(2,4-dihydroxyphenyl)-6-hydroxy-1-benzofuran-3-yl]methyl]-6H-[1]benzofuro[3,2-c]chromene-3,9-diol | -11.5 |
| ZINC000085734971 | 3,3'-Ethylidenebis(2-methyl-5-hydroxy-1,4-naphthoquinone)                                               | -10.6 |
| ZINC000014612330 | (4aR,12bR)-9-hydroxy-2,5,5-trimethyl-3,4,4a,12b-tetrahydronaphtho[3,2-c]isochromene-7,12-dione          | -10.3 |
| ZINC000100513617 | Indigo                                                                                                  | -9.6  |
| ZINC000013462928 | BDBM512896 or 3-(1,3-Benzodioxole-5-ylmethyl)-4,5-dihydrofuran-2(3H)-one                                | -9.9  |
